# Supplementary material for: Postural modulation of prepulse inhibition and its link to postural control: Insights from healthy subjects
Source: Research Square preprint supplement (doi:10.21203/rs.3.rs-6528482/v1), 2025-06-04
Supplement: Supplementary file 2 [file 728d5b28a573c9d5e757787d.docx]

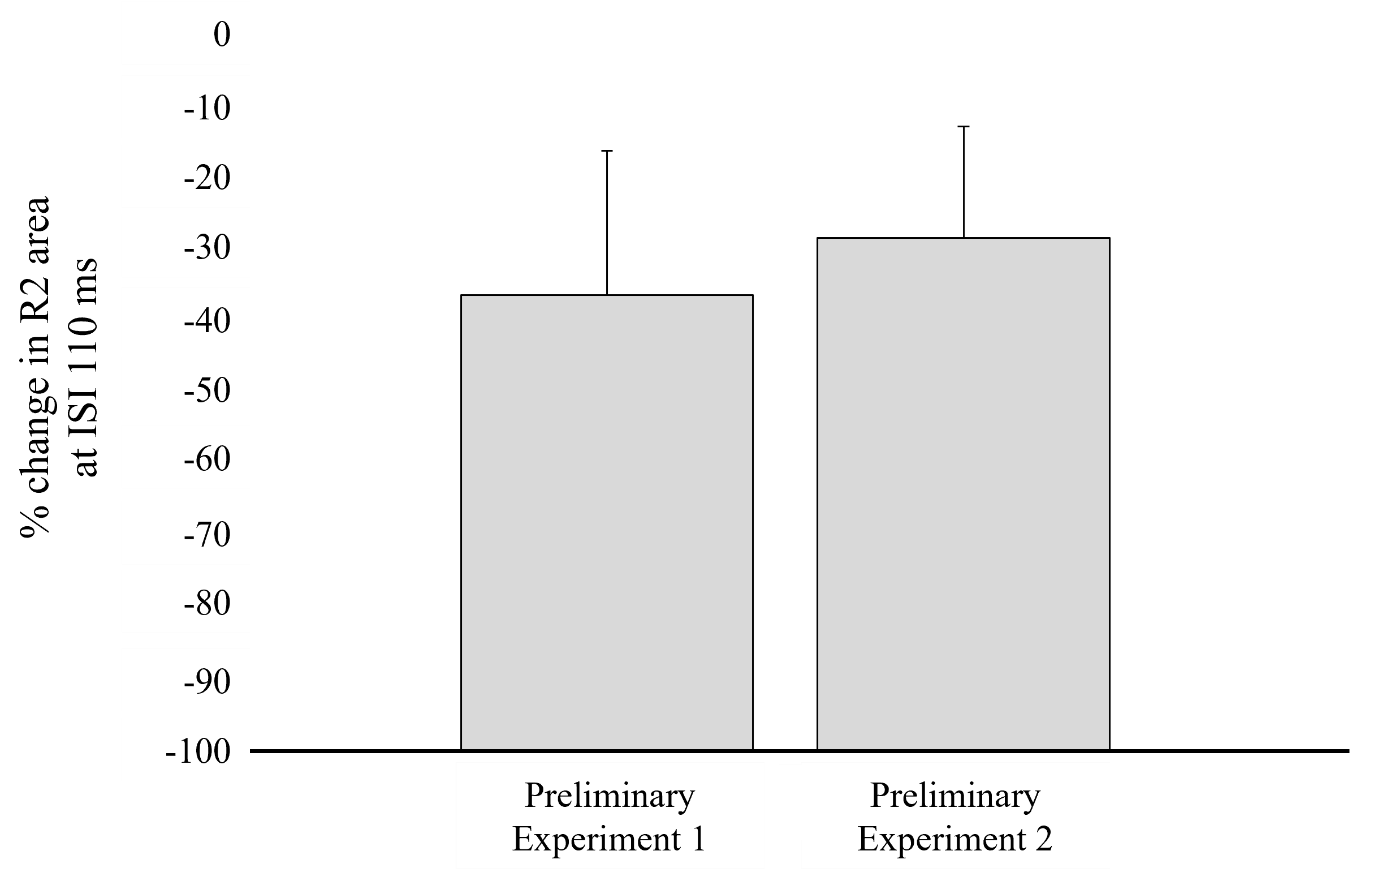


**Supplementary Figure 1: reliability of sPPI of R2 area at 110 ms**. Relative changes (%) in the R2 are illustrated. At an ISI of 110 ms, no statistically significant differences were noted between groups. sPPI at 110 ms was 36.33 % and 28.38 % during preliminary experiment 1 and 2 respectively.


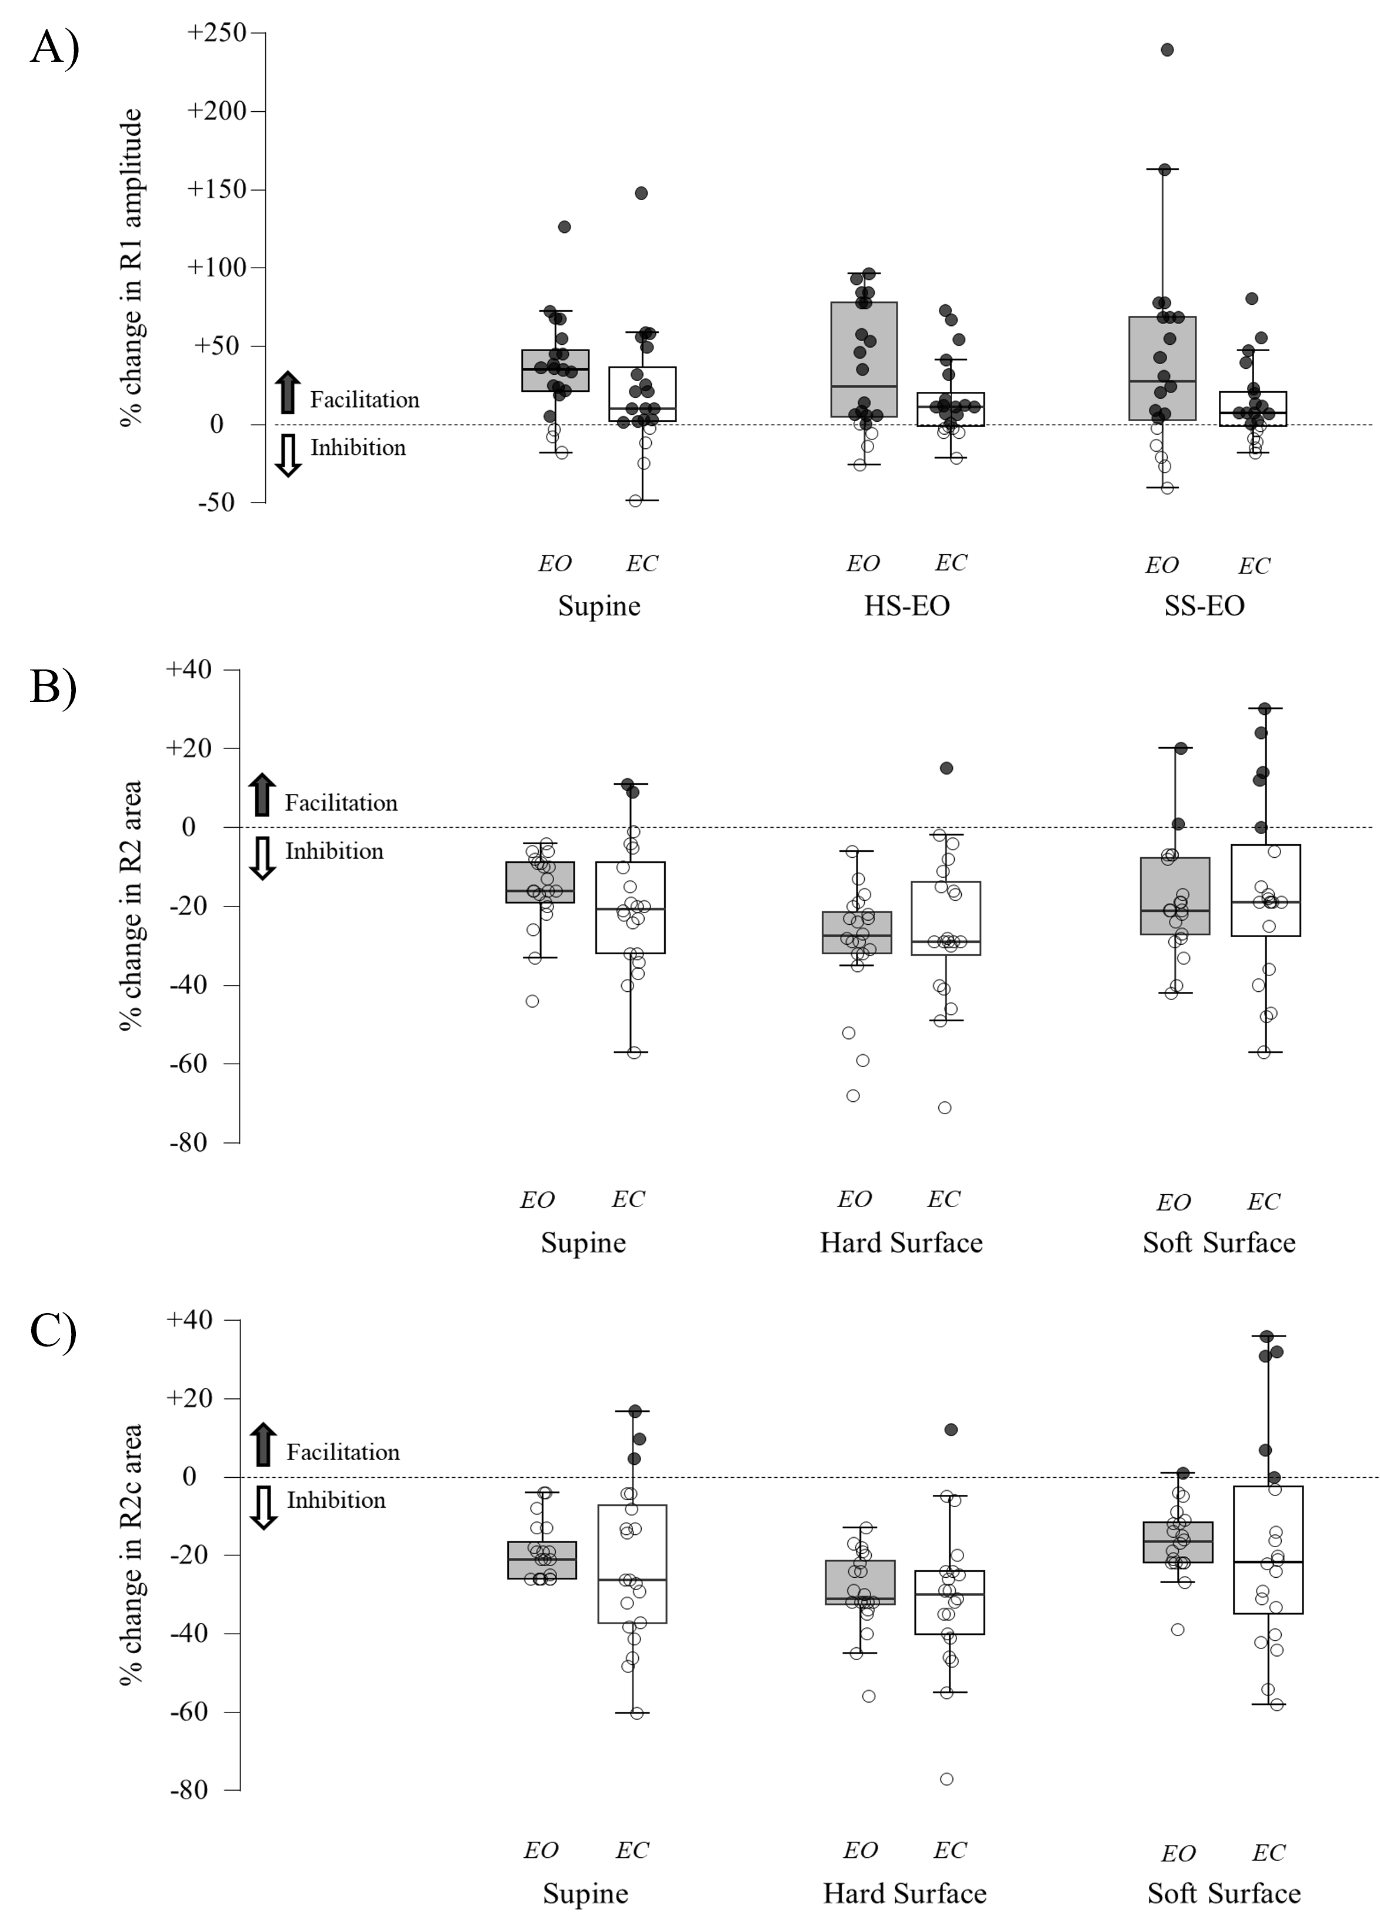


**Supplementary Figure 2: modulation of the R2 and R2c area according to posture and visual feedback.** Relative changes (%) in the R1 amplitude (mV) (A), R2 (B) and R2c (C) area (mV*ms) are illustrated. A statistically significant difference after Bonferroni correction is present between supine and hard surface and hard-surface and soft-surface regardless the visual feedback. EO: eyes open; EC: eyes closed. *: p< 0.0125.


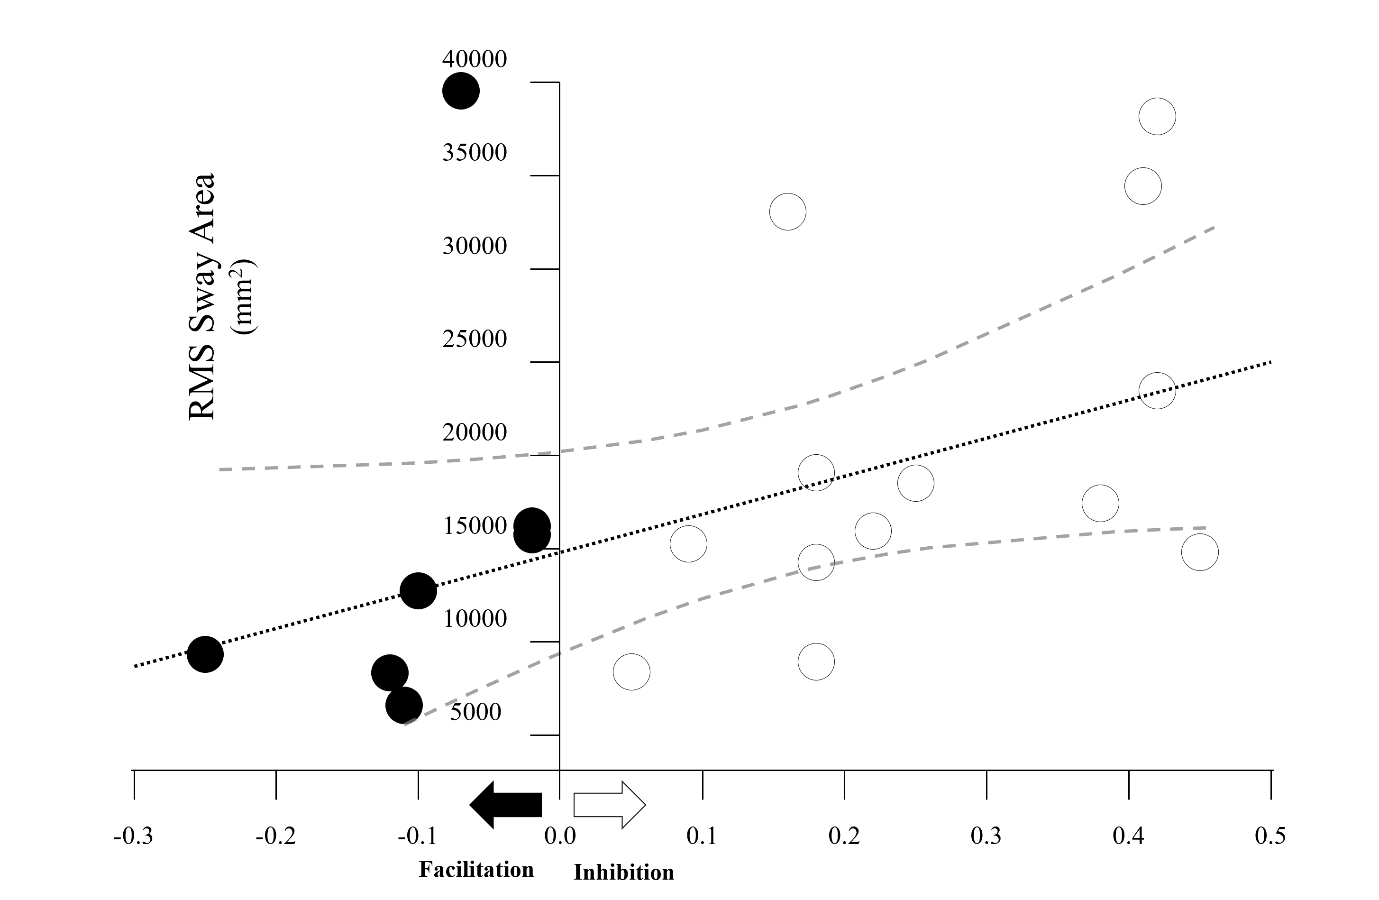


**Supplementary Figure 3: linear correlation between aPPI and sway area.** There is a positive linear correlation between aPPI and sway area while tandem standing. A trend towards a positive correlation is also present between aPPI and sway velocity (not reported). The blacked dotted line represents the regression line, while the two blue dashed lines represent the 95% confident interval.
